# Supplementary material for: Dysregulated gene expressions of MEX3D, FOS and BCL2 in human induced-neuronal (iN) cells from NF1 patients: a pilot study
Source: PubMed Central journal article supplement (PMC5654769; doi:10.1038/s41598-017-14440-7), 2017-10-24
Supplement: 41598_2017_14440_MOESM1_ESM.pdf [file 41598_2017_14440_MOESM1_ESM.pdf]

2017.09.13. Revise

**Journal:** Scientific Reports

**Title (19 / 20 words)**

Dysregulated gene expressions of *MEX3D*, *FOS* and *BCL2* in human induced-neuronal (iN) cells from NF1 patients: a pilot study

**Authors:** Noriaki Sagata <sup>1</sup>, Takahiro A. Kato <sup>1#</sup>, Shin-ichi Kano <sup>2</sup>, Masahiro Ohgidani <sup>1</sup>, Norihiro Shimokawa <sup>1</sup>, Mina Sato-Kasai <sup>1</sup>, Kohei Hayakawa <sup>1</sup>, Nobuki Kuwano <sup>1</sup>, Ashley M. Wilson <sup>2</sup>, Koko Ishizuka <sup>2</sup>, Shiori Kato <sup>3</sup>, Takeshi Nakahara <sup>3</sup>, Makiko Nakahara-Kido <sup>3</sup>, Daiki Setoyama <sup>4</sup>, Yasunari Sakai <sup>5</sup>, Shouichi Ohga <sup>5</sup>, Masutaka Furue <sup>3</sup>, Akira Sawa <sup>2</sup>, Shigenobu Kanba <sup>1</sup>

**Affiliations:**

- 1) Department of Neuropsychiatry, Graduate School of Medical Sciences, Kyushu University, Maidashi 3-1-1, Higashi-ku, Fukuoka 812-8582, Japan
- 2) Departments of Psychiatry, Mental Health, Neuroscience, and Biomedical Engineering, Johns Hopkins University School of Medicine and Bloomberg School of Public Health, 600 North Wolfe St., Baltimore, MD 21287, USA
- 3) Department of Dermatology, Graduate School of Medical Sciences, Kyushu University, Maidashi 3-1-1, Higashi-ku, Fukuoka 812-8582, Japan
- 4) Department of Clinical Chemistry and Laboratory Medicine, Graduate School of Medical Sciences, Kyushu University, Maidashi 3-1-1, Higashi-ku, Fukuoka 812-8582, Japan
- 5) Department of Pediatrics, Graduate School of Medical Sciences, Kyushu University, Maidashi 3-1-1, Higashi-ku, Fukuoka 812-8582, Japan

**#Correspondence to:** Takahiro A. Kato, M.D., Ph.D. (Associate Professor; takahiro@npsych.med.kyushu-u.ac.jp)

**Contents:**

Supplemental information: 4 Figures and 4 Tables (These are included in the following files: Supplemental information (Sagata et al.).pdf, NF1 iN – Supplementary Table 3.xlsx, and NF1 iN – Supplementary Table 4.xlsx.)

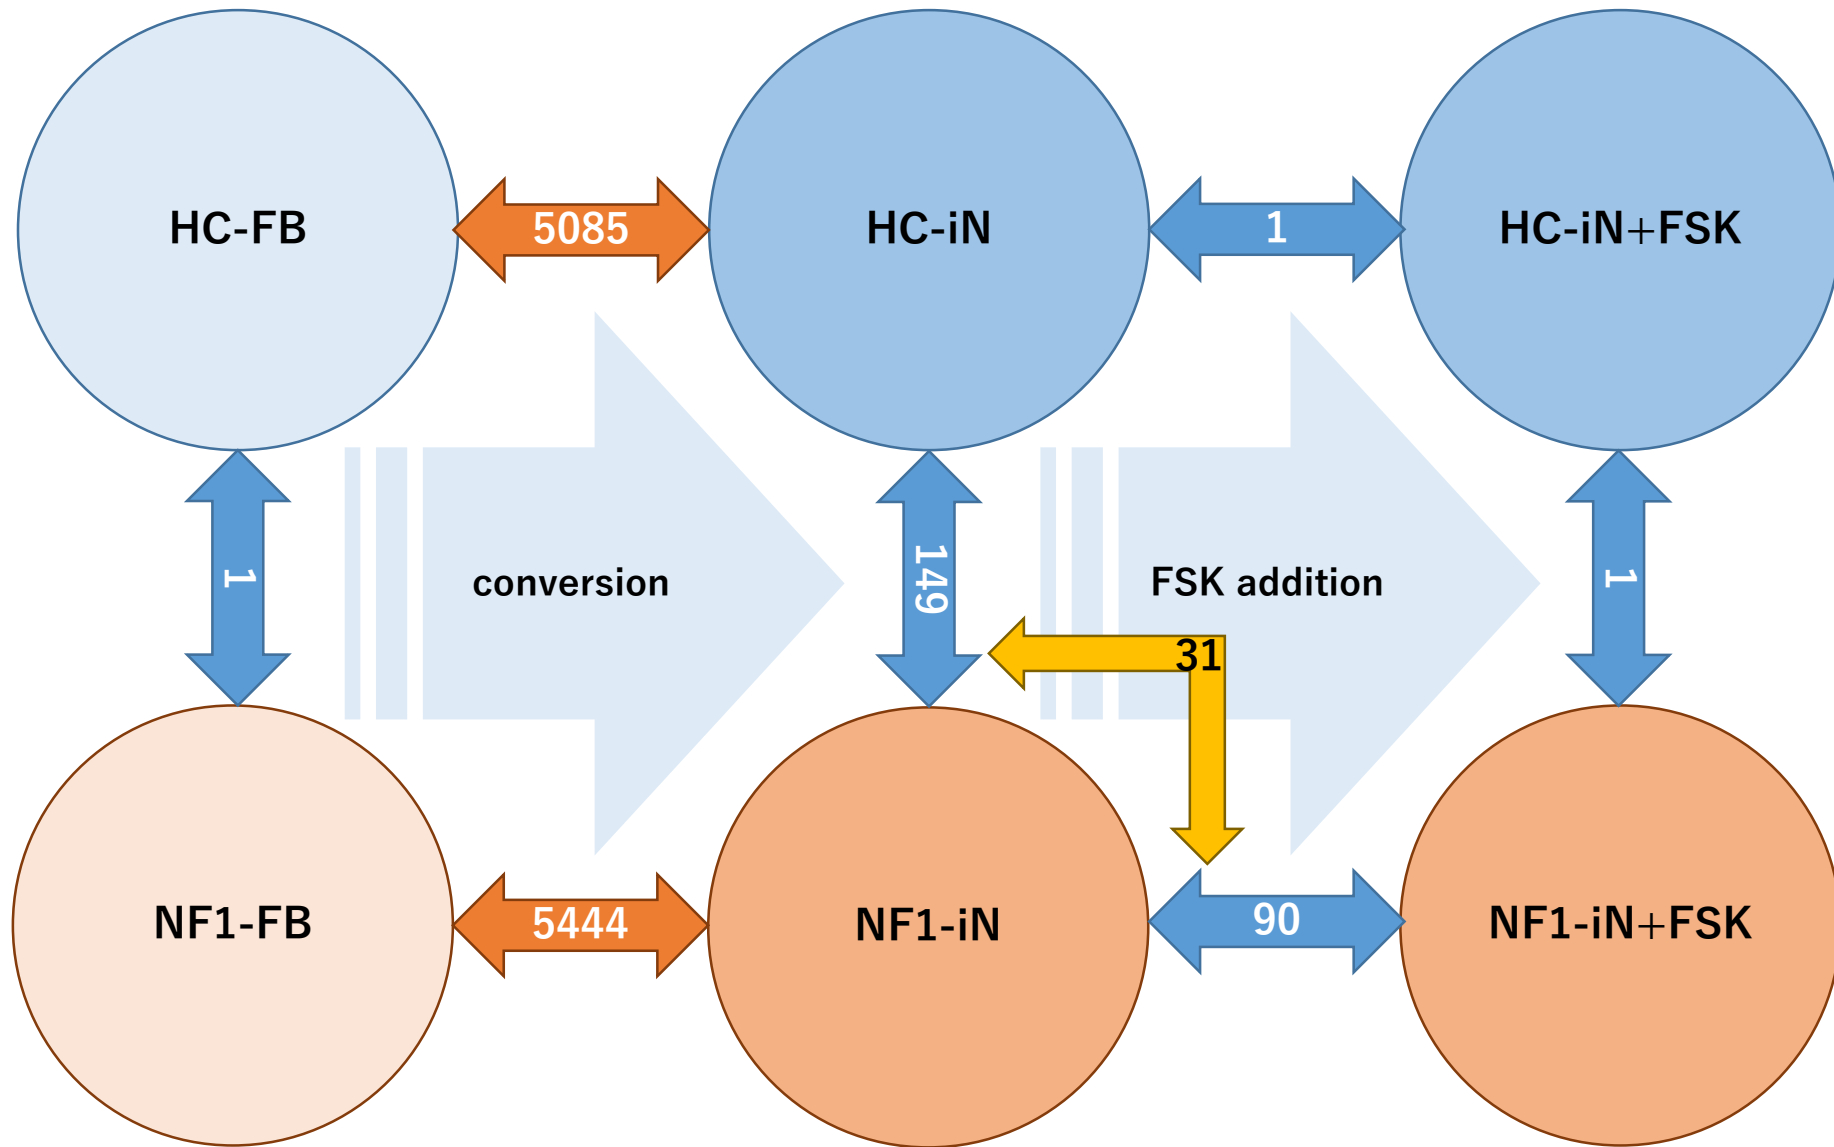

Supplementary Figure 1

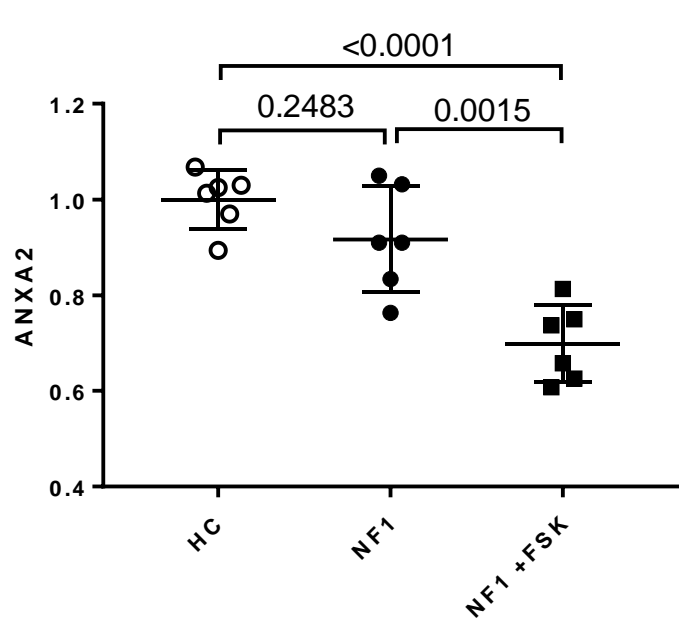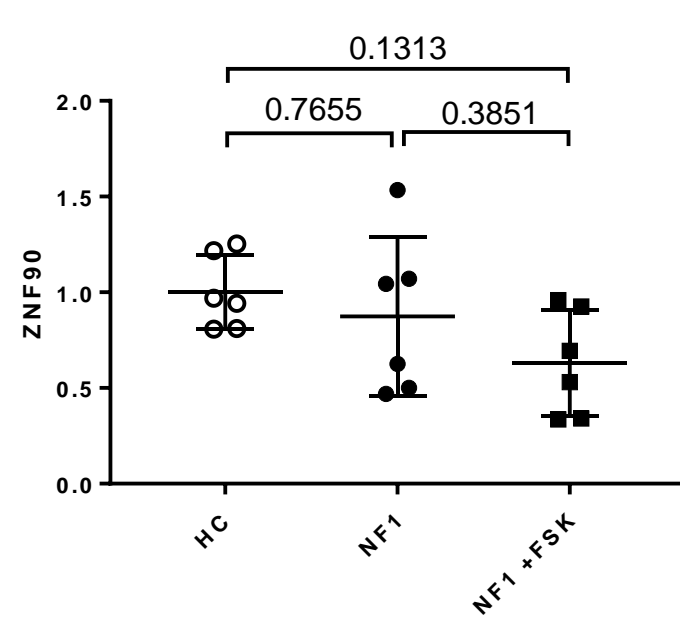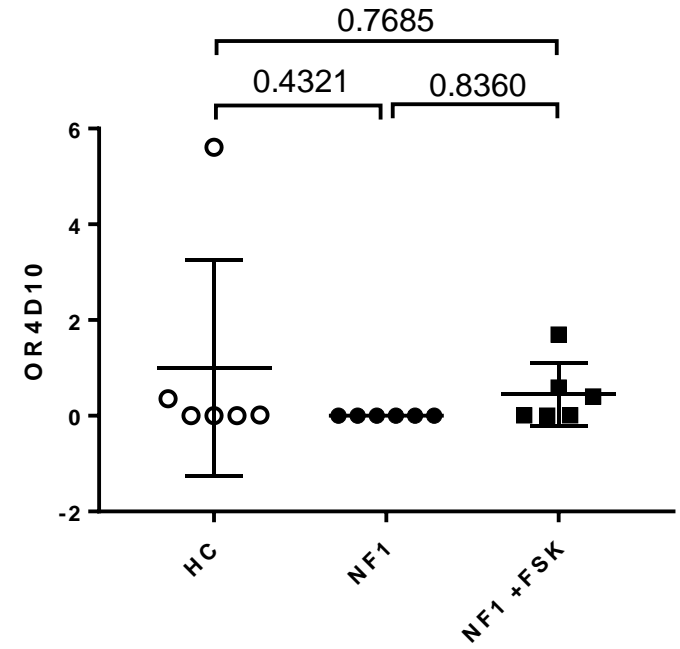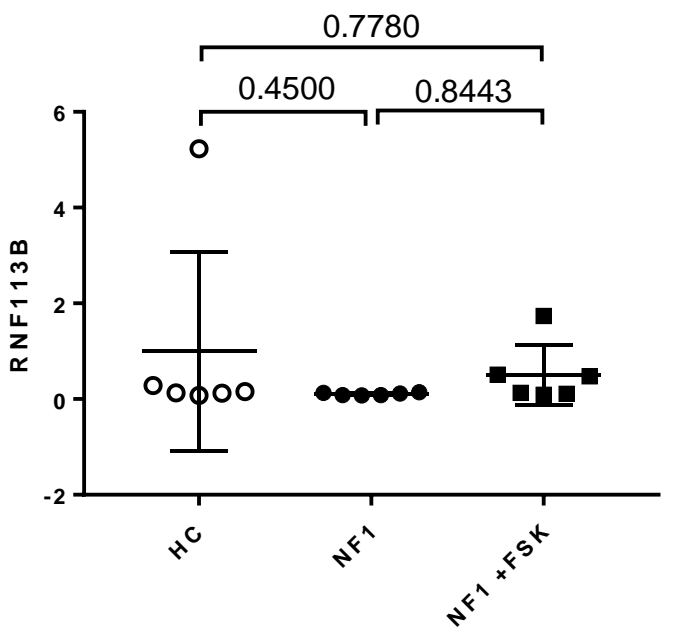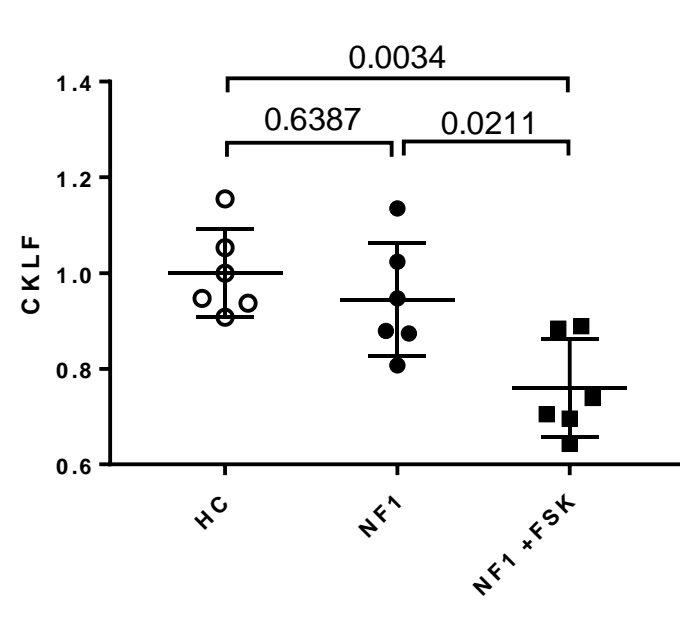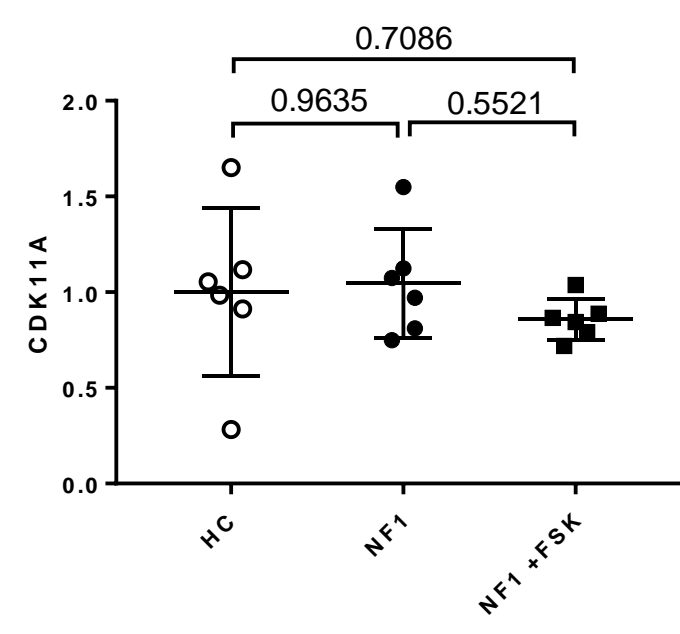

**Supplementary Figure 2**

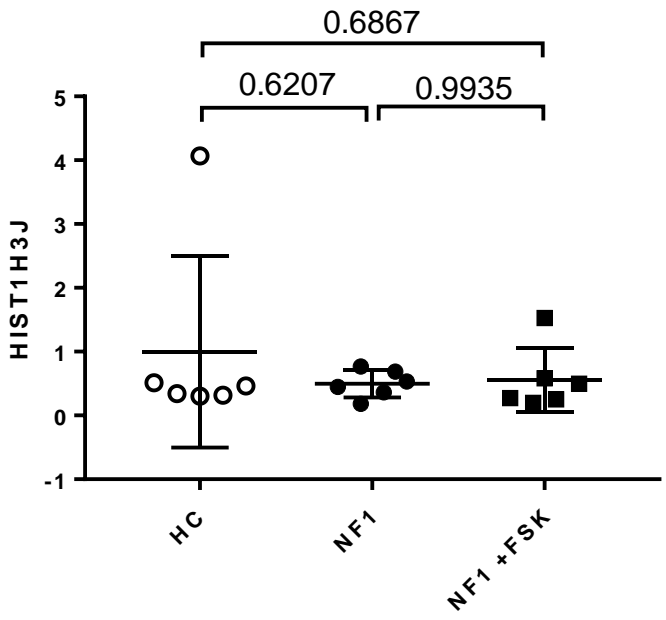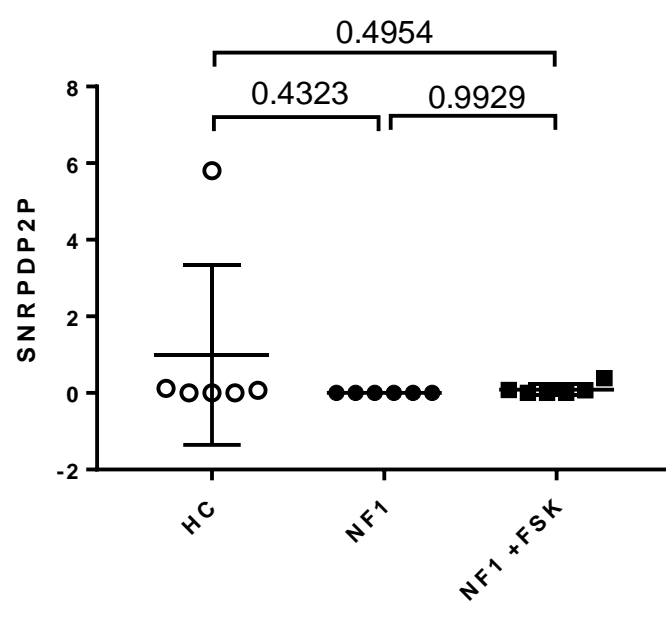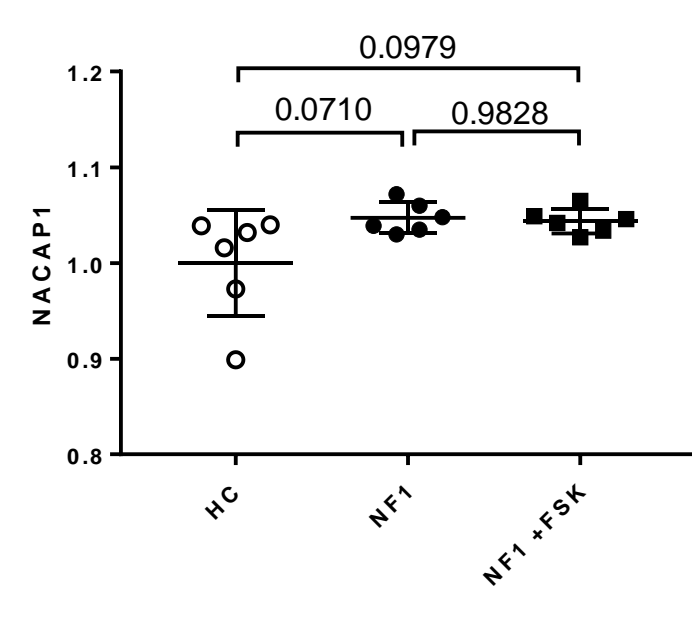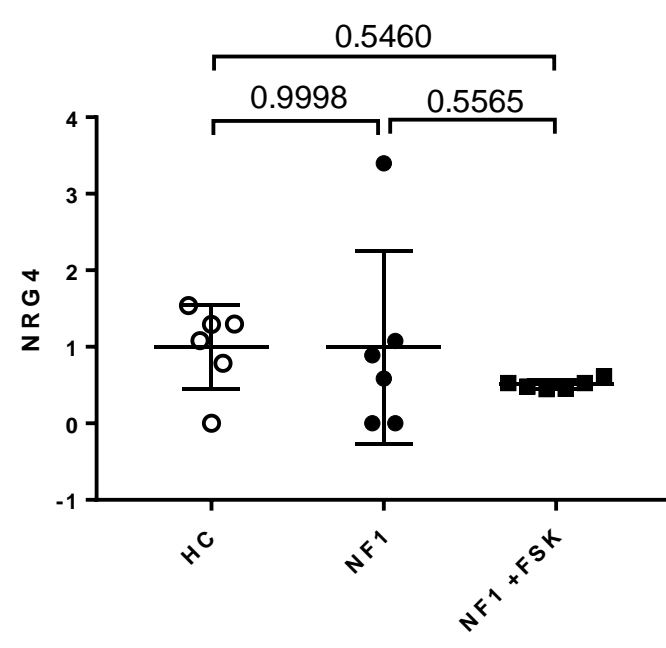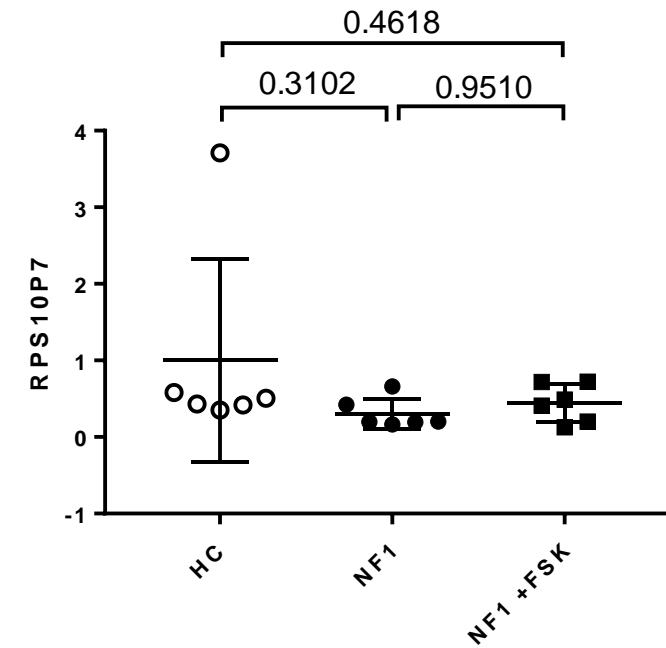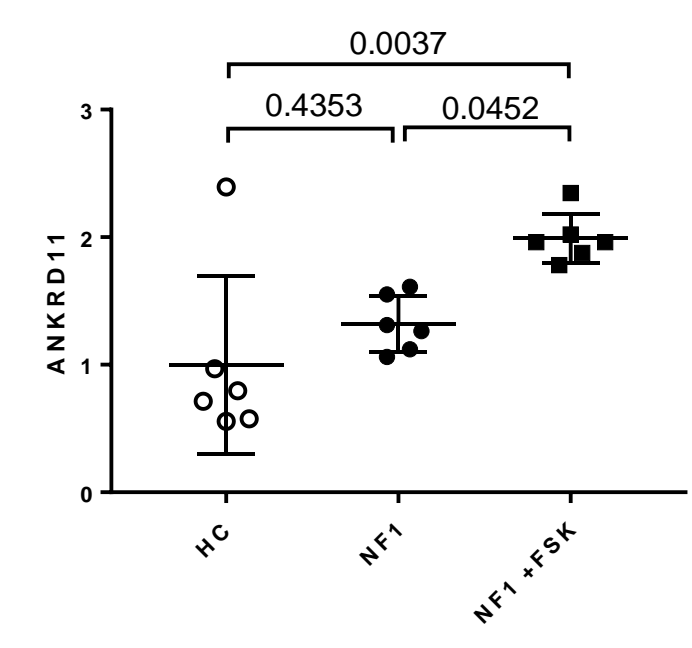

**Supplementary Figure 2 (continued)**

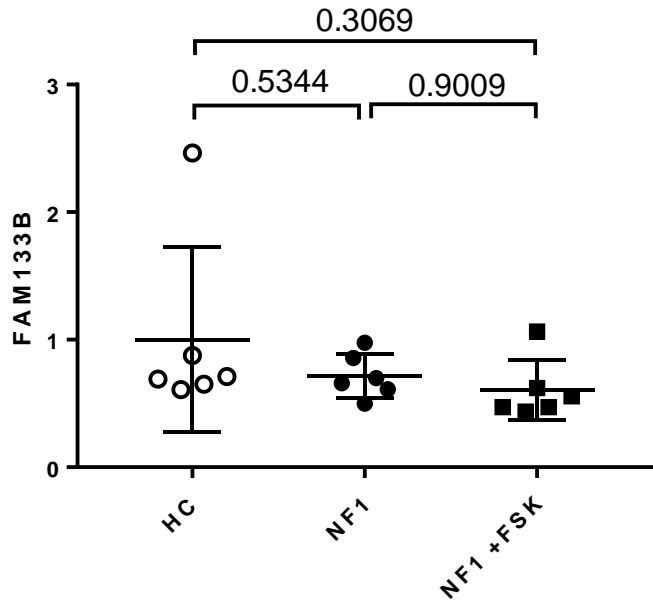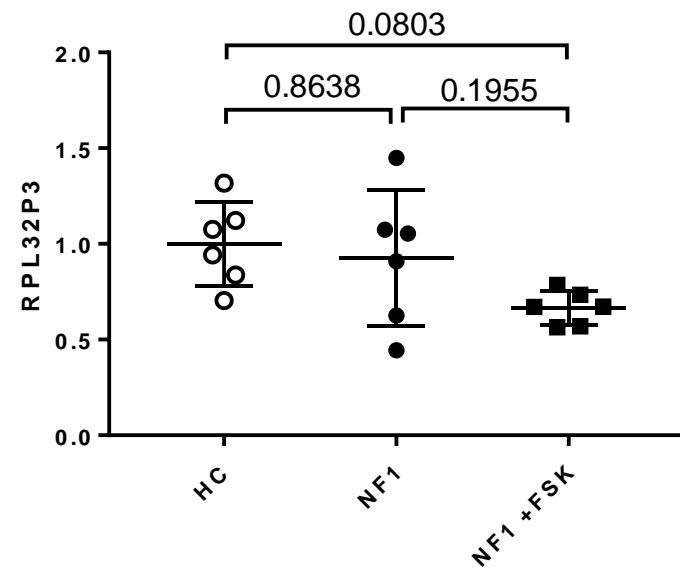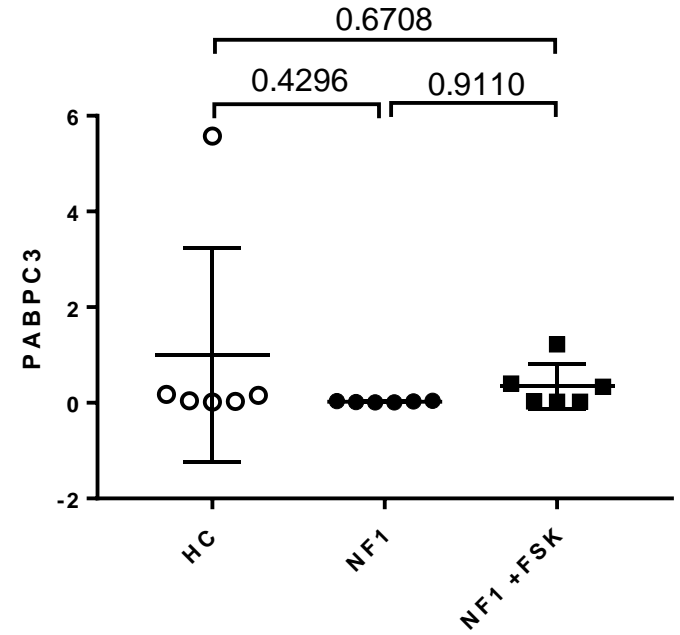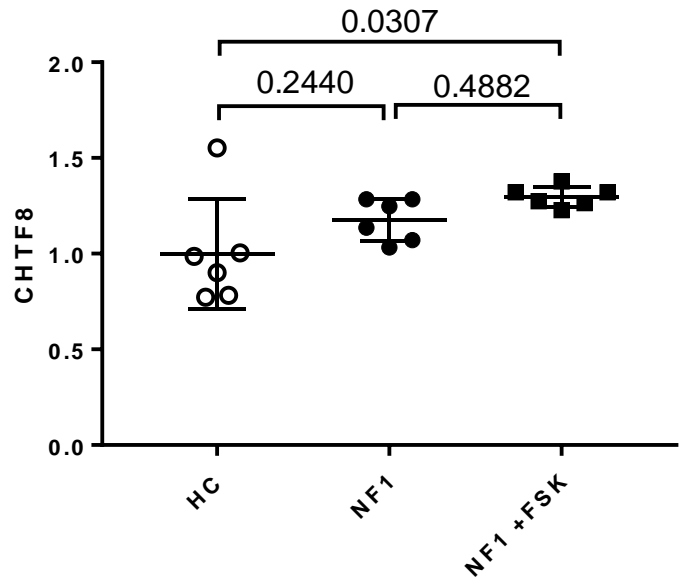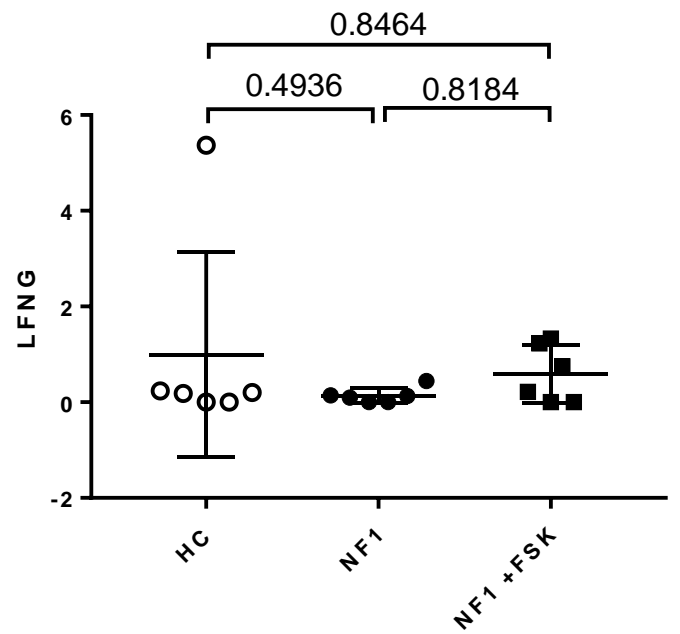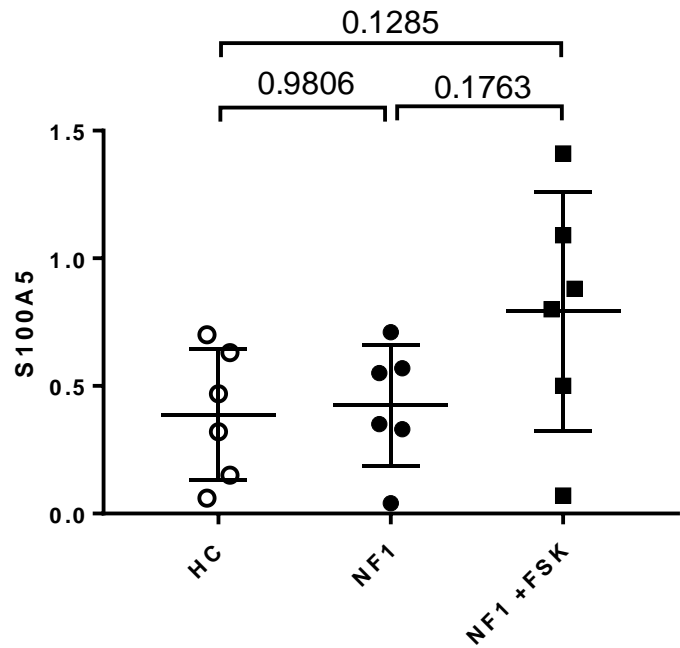

Supplementary Figure 2 (continued)

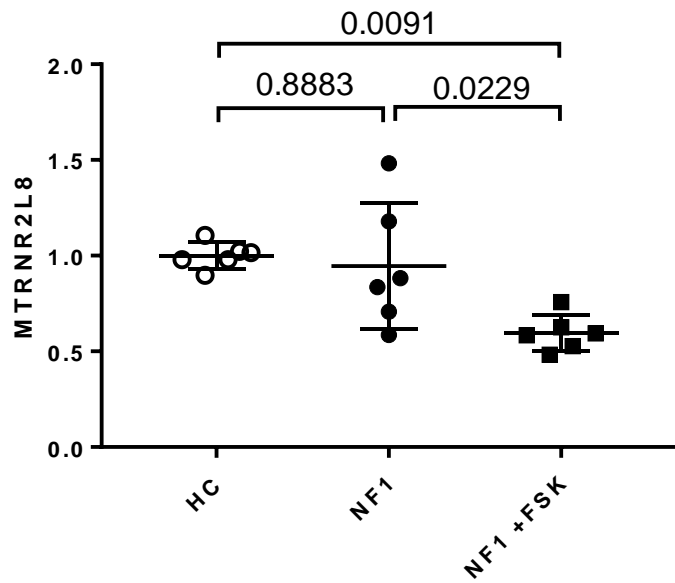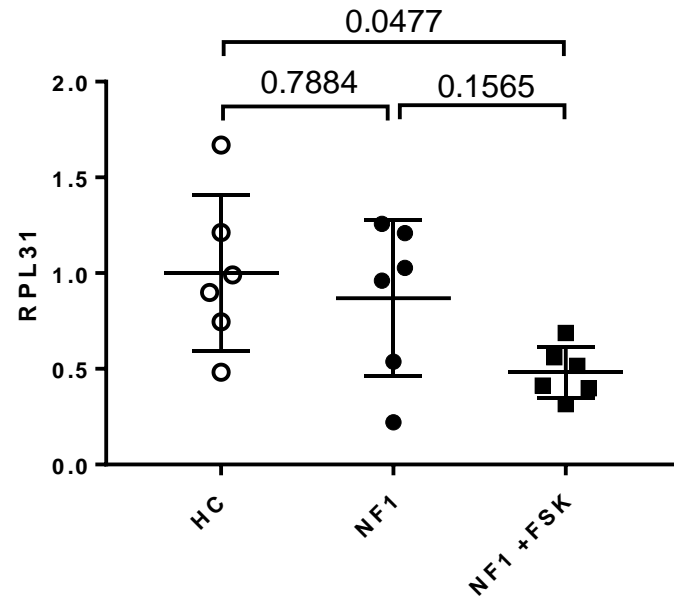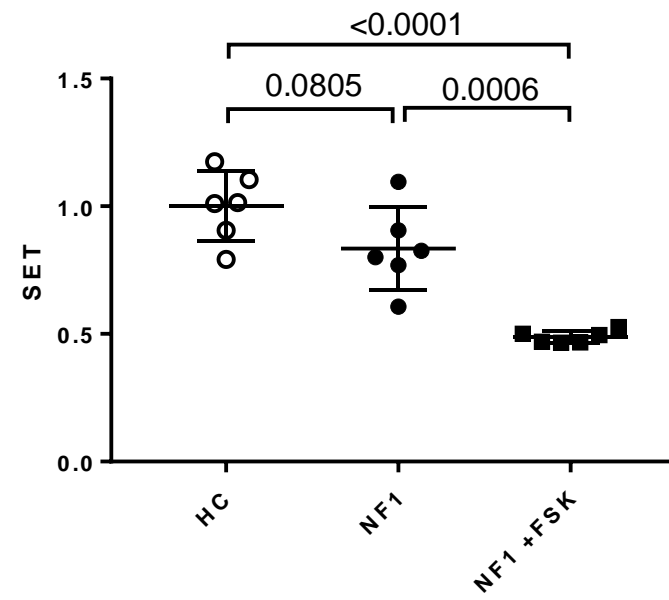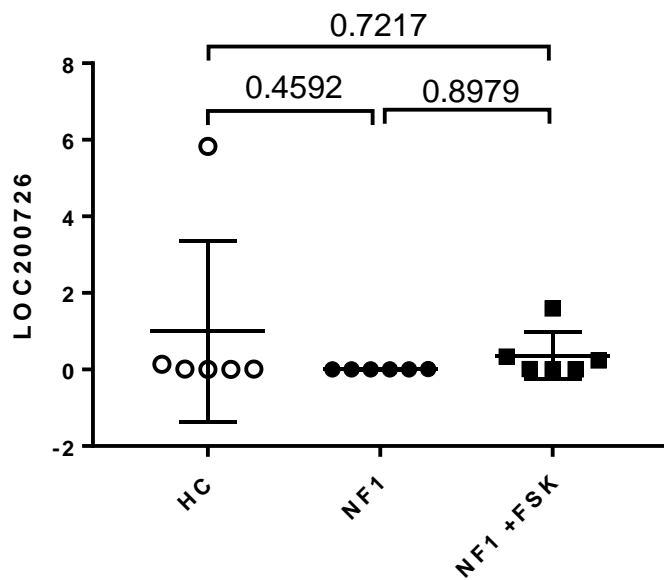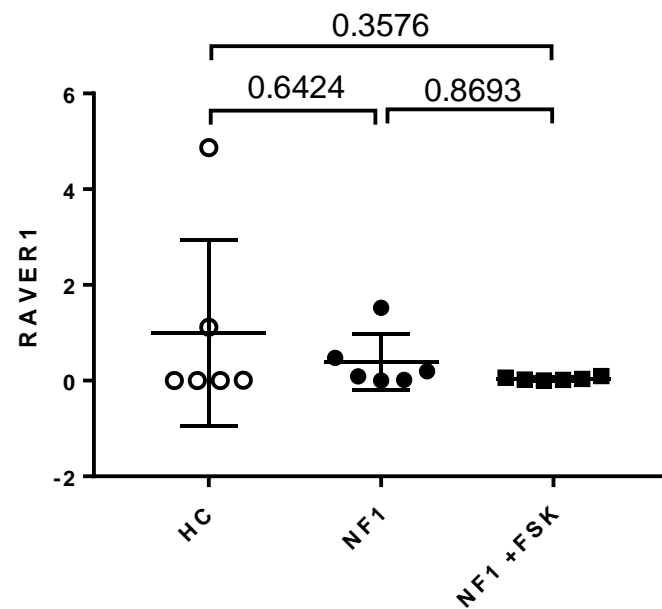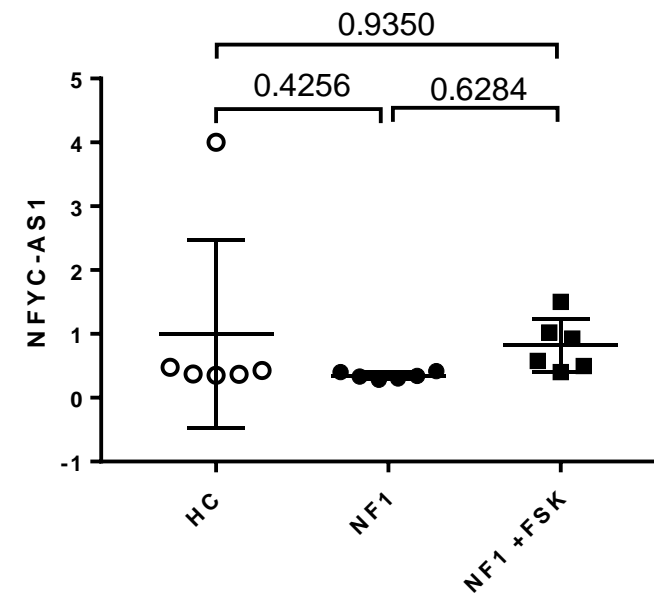

Supplementary Figure 2 (continued)

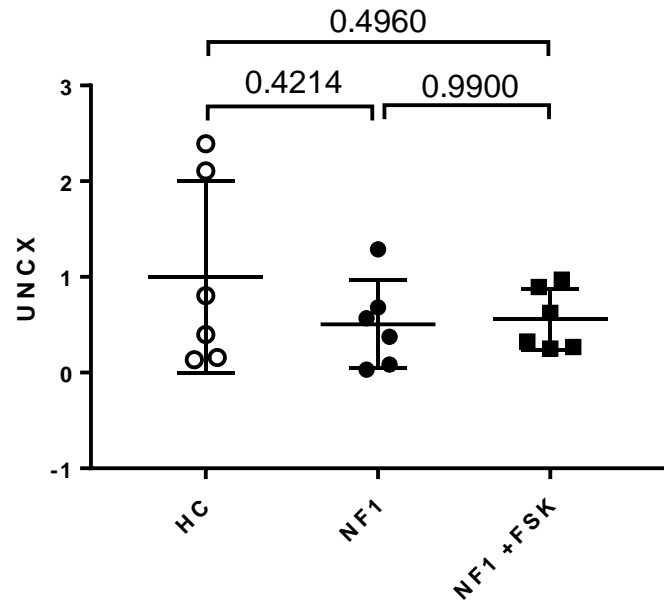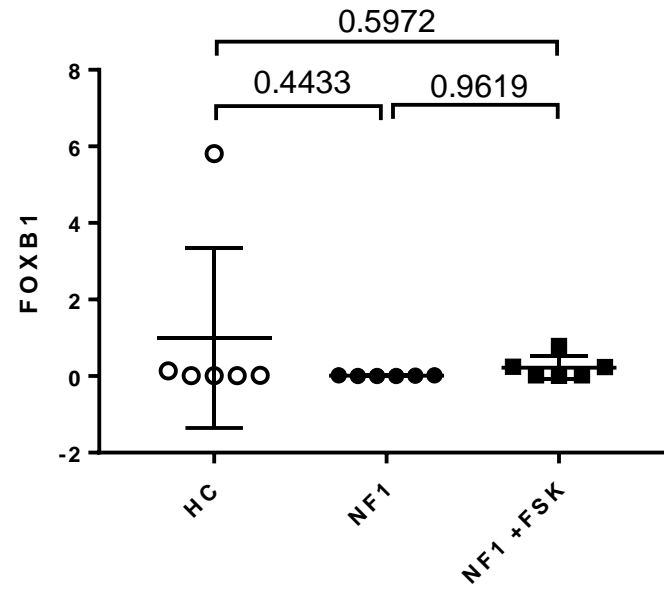

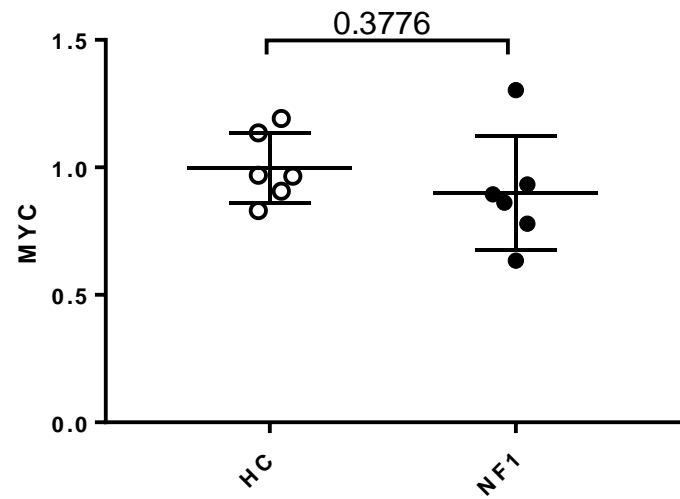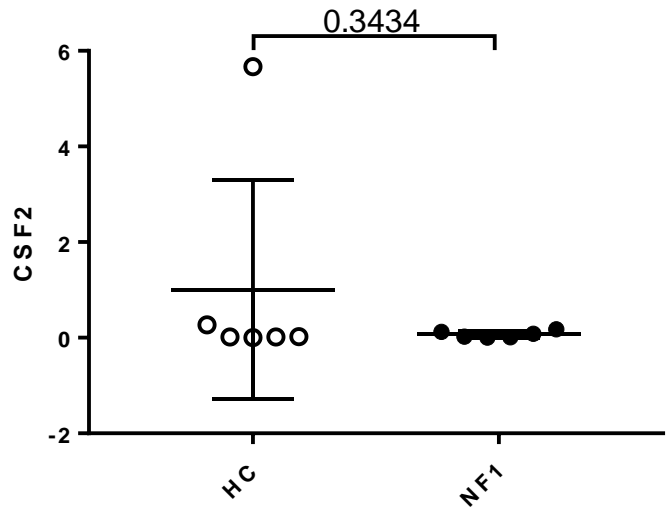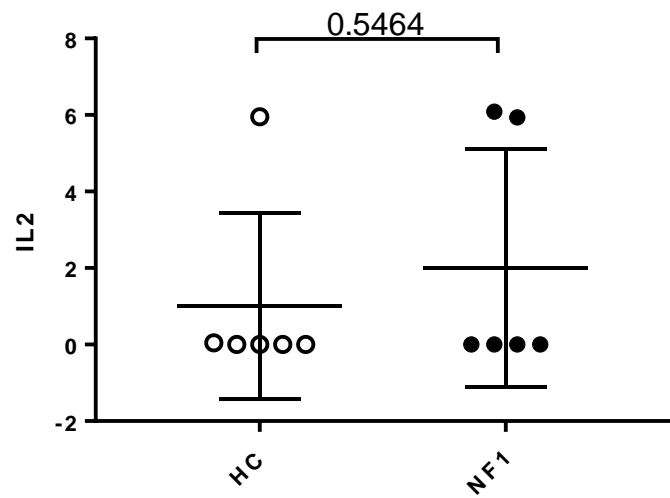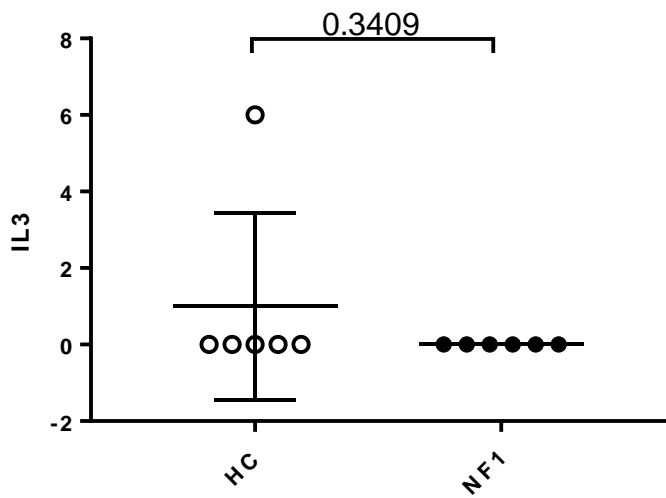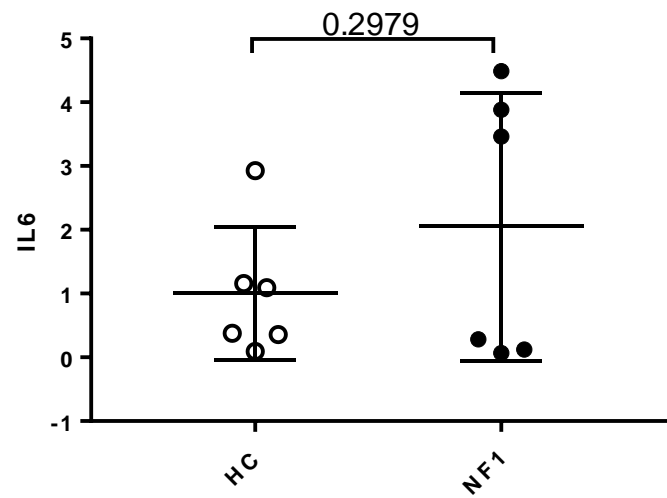

Supplementary Figure 3



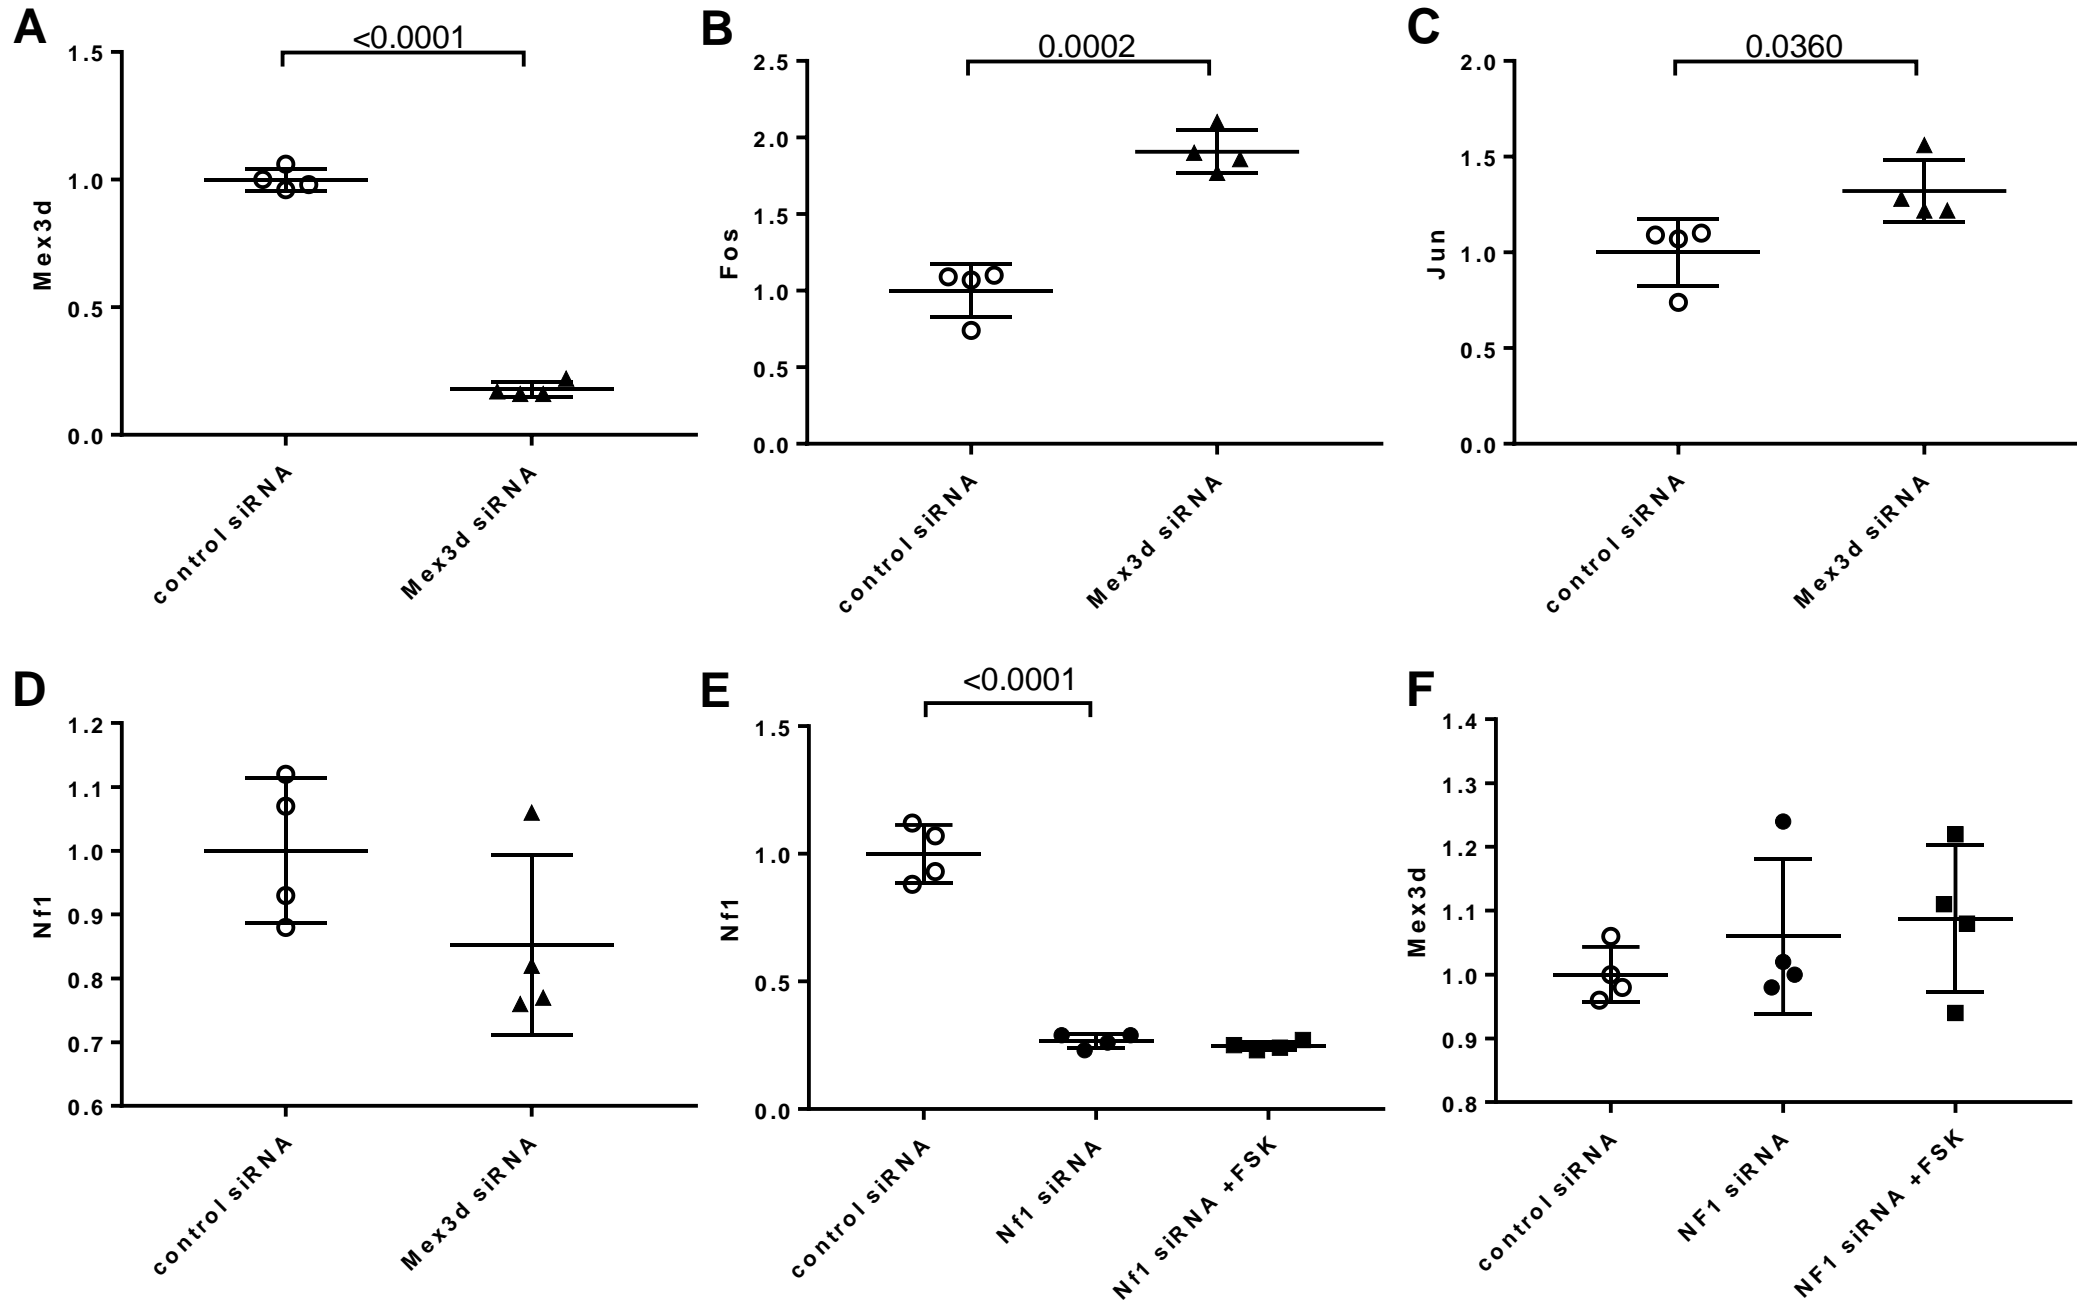

**Supplementary Figure 4**

**Supplementary Table 1: Information of fibroblasts for generating iN cells.**

| <b>Description</b> | <b>ID</b> | <b>Sex</b> | <b>Age</b> |
|--------------------|-----------|------------|------------|
| Healthy control    | GM03440*  | Male       | 20         |
|                    | GM05399   | Male       | 1          |
|                    | KYU-165*  | Male       | 21         |
|                    | KYU-166   | Male       | 22         |
|                    | KYU-168*  | Male       | 61         |
|                    | KYU-176   | Male       | 49         |
| NF1                | GM00622*  | Male       | 8          |
|                    | GM01633*  | Male       | 61         |
|                    | GM01639   | Female     | 19         |
|                    | GM01859*  | Male       | 41         |
|                    | KYU-101   | Female     | 67         |
|                    | KYU-177   | Female     | 35         |

(\*Samples for microarray analysis)

Supplementary Table 2: Information of the primer and probe number for quantitative real-time PCR.

| Species | Target    | Position      | Tm | %GC | Sequence                    | Probe# |
|---------|-----------|---------------|----|-----|-----------------------------|--------|
| human   | ANKRD11   | 5202 - 5220   | 60 | 58  | accagcttcgagaggatgc         | 85     |
|         |           | 5255 - 5272   | 60 | 61  | ctctcctgtgcccgttg           |        |
| human   | ANXA2     | 859 - 879     | 59 | 48  | ggaagcatcaggaaagaggt        | 85     |
|         |           | 913 - 934     | 59 | 45  | ctgttctgaatgcactgaacc       |        |
| human   | BCL2      | 2335 - 2354   | 59 | 60  | agagcagtagaggggtgtgg        | 57     |
|         |           | 2380 - 2397   | 59 | 56  | tgaaaacgggcctacctg          |        |
| human   | CDK11A    | 2462 - 2479   | 59 | 61  | accacagggcgtggctact         | 19     |
|         |           | 2512 - 2533   | 60 | 45  | catggagcacaagtaagacga       |        |
| human   | CHTF8     | 1448 - 1468   | 60 | 57  | caaacctgggtcctagctctc       | 81     |
|         |           | 1497 - 1515   | 59 | 53  | agcccttgacatggagat          |        |
| human   | CKLF      | 442 - 462     | 59 | 48  | ttggcactgataccagaaacc       | 22     |
|         |           | 487 - 507     | 60 | 48  | tgctgtcacaagtgcacaacac      |        |
| human   | CSF2      | 326 - 345     | 59 | 55  | cagccactacaagcagcact        | 3      |
|         |           | 456 - 473     | 59 | 67  | ccggtctcactcctggac          |        |
| human   | FAM133B   | 1139 - 1162   | 59 | 33  | ttttctctccagtgctgataa       | 14     |
|         |           | 1185 - 1211   | 59 | 41  | cccaaatatcttaaccactgtacgac  |        |
| human   | FOS       | 292 - 311     | 60 | 60  | ctaccactcaccgcagact         | 67     |
|         |           | 345 - 363     | 59 | 58  | aggctccgtgcagaagtctt        |        |
| human   | FOXB1     | 784 - 801     | 60 | 56  | atccccgtgccattaag           | 27     |
|         |           | 852 - 870     | 59 | 58  | cgagttcgagagcaaggtg         |        |
| human   | HIST1H3J  | 342 - 361     | 59 | 50  | cgccaagcgtgtcactatta        | 42     |
|         |           | 404 - 425     | 59 | 50  | gatagagcaggggattatgctc      |        |
| human   | IL2       | 261 - 281     | 59 | 48  | aggccacgaaactgaaacatc       | 65     |
|         |           | 332 - 354     | 59 | 35  | aagtgaagttttgtcttgagc       |        |
| human   | IL3       | 164 - 190     | 59 | 30  | catgatcgatgaaattataacacactt | 83     |
|         |           | 271 - 288     | 60 | 61  | cctccagggttgcccttc          |        |
| human   | IL6       | 109 - 128     | 59 | 55  | caggagcccagctatgaaact       | 7      |
|         |           | 182 - 199     | 60 | 61  | gaaggcagcaggcaacac          |        |
| human   | JUN       | 3012 - 3032   | 59 | 43  | ccaaaggatagtcgatgttt        | 19     |
|         |           | 3054 - 3073   | 60 | 60  | ctgtccctcctcactgcaac        |        |
| human   | LFNG      | 1280 - 1298   | 60 | 63  | cctggagagcaggagcagt         | 23     |
|         |           | 1333 - 1351   | 59 | 58  | caagcgtctggatctctgc         |        |
| human   | LOC200726 | 4-21          | 60 | 61  | aagctggggacagccact          | 55     |
|         |           | 56 - 76       | 59 | 52  | tgagagaggtccctcgagta        |        |
| human   | MAP2      | 188 - 214     | 59 | 33  | cgaaactttatattaccactctctg   | 2      |
|         |           | 244 - 263     | 60 | 50  | ccgttcatctgccattctc         |        |
| human   | MEX3D     | 663 - 680     | 60 | 61  | gccggtctcatcgtgac           | 12     |
|         |           | 707 - 725     | 59 | 58  | gacaggatctcacgcttg          |        |
| human   | MTRNR2L8  | 423 - 444     | 59 | 50  | gaggaacagctctttggacact      | 83     |
|         |           | 513 - 532     | 60 | 45  | tcgagctgacgccttctt          |        |
| human   | MYC       | 514 - 533     | 59 | 50  | gctgcttagacgtggattt         | 66     |
|         |           | 569 - 586     | 60 | 56  | taacgttgagggcatcg           |        |
| human   | NACAP1    | 344 - 363     | 60 | 55  | tgttcaagagcccgcctc          | 60     |
|         |           | 409 - 429     | 60 | 52  | gctgctagtgtgcttctga         |        |
| human   | NF1       | 2314 - 2338   | 60 | 40  | ccatgatcatgaagaattactacg    | 1      |
|         |           | 2385 - 2404   | 59 | 55  | ctgcatctgctgcactatc         |        |
| human   | NFYC-AS1  | 300 - 319     | 59 | 55  | aagtgaggctctggcgaag         | 70     |
|         |           | 355 - 373     | 59 | 58  | tctgtcgaggggtgatagg         |        |
| human   | NRG4      | 242 - 263     | 59 | 45  | ggggctttgtatgtatacct        | 23     |
|         |           | 284 - 307     | 59 | 42  | cctgtatagtttcaacgcaccta     |        |
| human   | OR4D10    | 418 - 435     | 60 | 50  | catgcatgggctcaca            | 27     |
|         |           | 463 - 482     | 59 | 50  | gaaatctgcacgatggagtg        |        |
| human   | PABPC3    | 1407 - 1425   | 59 | 63  | gcccaggtgctcctagagt         | 54     |
|         |           | 1456 - 1476   | 60 | 52  | gacatgactcgtggaacctgt       |        |
| human   | PSPHP1    | 347 - 365     | 60 | 58  | ctctgggtcaggcagtt           | 10     |
|         |           | 406 - 425     | 60 | 45  | ttctccaaagccaatgaaag        |        |
| human   | RAVER1    | 2816 - 2834   | 59 | 58  | ccccagctctgattccttc         | 49     |
|         |           | 2865 - 2883   | 60 | 47  | tgtttcaaaccgcaagggtg        |        |
| human   | RBFOX3    | 751 - 768     | 60 | 61  | ggggaaaccctcaccaaa          | 11     |
|         |           | 798 - 817     | 59 | 55  | qaattcaqcccotaagactg        |        |
| human   | RNF113B   | 1035 - 1056   | 59 | 50  | gcagcctgtgagtaagatgag       | 4      |
|         |           | 1081 - 1102   | 59 | 45  | ttggttacatactcaggcatgg      |        |
| human   | RPL31     | 4-23          | 60 | 55  | cgaccgggaagttgactctg        | 7      |
|         |           | 98 - 115      | 59 | 56  | tctcgaccctcttttg            |        |
| human   | RPL32P3   | 43 - 64       | 59 | 45  | ccagtcagaccgatgtgcaaa       | 31     |
|         |           | 134 - 153     | 60 | 45  | tgctgggcatcatatcaaga        |        |
| human   | RPS10P7   | 104 - 123     | 59 | 50  | gaaagaacgtgcttccag          | 83     |
|         |           | 154 - 176     | 60 | 43  | ccagttctcttaggcatcaaca      |        |
| human   | S100A4    | 138 - 158     | 60 | 48  | gggtgacaagttcaagctcaa       | 17     |
|         |           | 211 - 232     | 59 | 41  | aagcagcttcatctgtccttt       |        |
| human   | S100A5    | 180 - 200     | 59 | 48  | agggaacagagatcagggaat       | 8      |
|         |           | 278 - 298     | 59 | 57  | ccagaggagtctccatcacag       |        |
| human   | SAMD3     | 925 - 942     | 59 | 56  | cgtggttaatgccctgct          | 76     |
|         |           | 982 - 1002    | 59 | 43  | agggctggttccataaaaaag       |        |
| human   | SET       | 2367 - 2387   | 59 | 38  | aaaattggcctttacctgga        | 87     |
|         |           | 2415 - 2434   | 60 | 55  | gagcaccaggtctgtggat         |        |
| human   | SNRPD2P2  | 532 - 551     | 60 | 60  | gcaggggactcagtcacacc        | 10     |
|         |           | 605 - 625     | 59 | 52  | ccccatacaaaagggtaggtc       |        |
| human   | UNCX      | 1850 - 1875   | 59 | 35  | aagagtaaacgaaagtgtgtatgaa   | 27     |
|         |           | 1896 - 1914   | 59 | 63  | gtctcaccocagtcctgt          |        |
| human   | ZNF90     | 349 - 366     | 59 | 50  | gattgccaaatcccaga           | 19     |
|         |           | 399 - 417     | 59 | 53  | acacagagattgcgctgct         |        |
| mouse   | Fos       | 210 - 230     | 59 | 57  | gggacagccttctactacc         | 67     |
|         |           | 278 - 297     | 60 | 50  | agatctgcgaaaagtctctg        |        |
| mouse   | Jun       | 154 - 173     | 59 | 45  | tttctaccaactgcttgg          | 92     |
|         |           | 199 - 218     | 59 | 45  | ccaaatgctcccaaaatac         |        |
| mouse   | Mex3d     | 1562 - 1579   | 60 | 61  | gccttgaggggataacg           | 71     |
|         |           | 1607 - 1624   | 59 | 61  | ggctgcccacatagaagg          |        |
| mouse   | Nf1       | 10872 - 10892 | 59 | 48  | tccccaaaaggagactcta         | 68     |
|         |           | 10920 - 10941 | 59 | 36  | ccaaattgtgtaaatgggaca       |        |

**Supplementary Figure 1: Simplified schematic of microarray analysis.** Circles show 6 sample groups; healthy control fibroblast (HC-FB), NF1 patient fibroblast (NF1-FB), healthy control iN cells (HC-iN), NF1 patient iN cells (NF1-iN), healthy control iN cells with forskolin (HC-iN+FSK), and NF1 patient iN cells with forskolin (NF1-iN+FSK). Blue and orange double arrows indicate the number of aberrant genes between two groups (circles). A yellow double arrow indicates the number of overlapping genes between two blue double arrows.

**Supplementary Figure 2: Quantification of mRNA expressions by real-time PCR.** There were no significant changes on the expressions of 26 genes of Day-14 iN cells between HC and NF1 group. One-way ANOVA / Tukey's test, n = 6 each group. Open circles show healthy controls and filled circles and squares show NF1 patients.

**Supplementary Figure 3: Quantification of AREs-including mRNA expressions by real-time PCR.** There were no significant differences on the expressions of 5 genes of Day-14 iN cells between HC and NF1 group. Student's t-test, n = 6 each group. Open circles show healthy controls and filled circles show NF1 patients.

**Supplementary Figure 4: Quantification of mRNA expressions of Neuro2A cells by real-time PCR.** (A-D) *Mex3d*, *Fos*, *Jun*, and *Nf1* mRNA expression level, respectively. Student's t-test, n = 4 each group. (E-F) *Nf1* and *Mex3d* mRNA expression level, respectively. One-way ANOVA / Tukey's test, n = 4 each group. Open circles show control siRNA, filled triangles show *Mex3d* knockdown using siRNA, and filled circles and squares show *Nf1* knockdown using siRNA.

**Supplementary Table 1: Supplementary Table 1. Information of fibroblasts for generating iN cells.**

**Supplementary Table 2: Information of the primer and probe number for quantitative real-time PCR.**

**Supplementary Table 3: Significantly different 149 gene expressions in NF1-iN cells compared to HC-iN cells determined by microarray analysis.**

**Supplementary Table 4: Significantly different 90 gene expressions in NF1-iN cells compared to NF1-iN cells with forskolin determined by microarray analysis.**
